# Supplementary material for: Multiplanar knee kinematics-based test battery helpfully guide return-to-sports decision-making after anterior cruciate ligament reconstruction
Source: Frontiers journal article supplement (doi:10.3389/fbioe.2022.974724), 2022-09-16
Supplement: Data_Sheet_1.pdf [file Data_Sheet_1.pdf]

## Supplementary material

### Analysis for male subjects

Significant differences between affected and contralateral limbs were observed in the quadriceps strength ( $P < 0.001$ ), hamstring strength ( $P = 0.002$ ), SH distance ( $P < 0.001$ ), and TH distance ( $P < 0.001$ ) at 9 months after ACLR. Affected limbs had smaller rotational angles than did contralateral limbs ( $P = 0.007$ ); no significant difference in other kinematic parameters was observed. The mean kinematics LSIs did not exceed 80%, except for that for the flexion angle ROM (Supplementary Table 2).

Three (11.54%) patients fulfilled the criteria of the test protocol. Eleven patients fulfilled the quadriceps and 10 patients fulfilled the hamstring strength criteria, 8 patients fulfilled the SH criterion, 10 patients fulfilled the TH criterion, and 22 patients fulfilled the knee laxity criterion. Eighteen, 6, 5 patients fulfilled the flexion-extension, varus-valgus, and internal-external rotation ROM criterion. Six, 8, and 7 patients, respectively, fulfilled the anterior-posterior, proximal-distal, medial-lateral translation ROM criterion. Fourteen patients fulfilled the IKDC scale score criterion and 8 patients fulfilled the ACL-RSI scale score criterion (Supplementary Table 3).

The trend of the results and conclusion are consistent with the overall group.

**Supplementary Table 1 Participant characteristics male subjects**

|                             | Patients        |
|-----------------------------|-----------------|
| male                        | 26              |
| Injured knee: left/right, n | 11/15           |
| Graft type: HT/SG, n        | 25/1            |
| Age, y                      | $27.9 \pm 5.9$  |
| Height, cm                  | $180.2 \pm 6.5$ |
| Weight, kg                  | $79.9 \pm 12.9$ |
| BMI, kg/m <sup>2</sup>      | $24.5 \pm 3.0$  |
| Time post-surgery, m        | $9.2 \pm 0.5$   |
| IKDC score                  | $80.7 \pm 11.0$ |
| ACL-RSI score               | $49.5 \pm 9.0$  |

HT: hamstring tendon graft; SG: synthetic graft; BMI: body mass index; IKDC: International Knee Documentation Committee Subjective Knee Evaluation Form; ACL-RSI: Anterior Cruciate Ligament-Return to Sport After Injury Scale

**Supplementary Table 2 Functional and kinematics parameters <sup>a</sup>**

|                          | Affected limb    | Contralateral limb | LSI             | P value    |
|--------------------------|------------------|--------------------|-----------------|------------|
| Functional tests         |                  |                    |                 |            |
| Extensor strength, Nm/kg | $1.5 \pm 0.5$    | $1.8 \pm 0.6$      | $84.5 \pm 19.8$ | $<0.001^*$ |
| Flexor strength, Nm/kg   | $0.9 \pm 0.3$    | $1.1 \pm 0.3$      | $85.9 \pm 25.2$ | $0.002^*$  |
| SLH, cm                  | $126.7 \pm 15.1$ | $145.2 \pm 13.2$   | $87.2 \pm 6.0$  | $<0.001^*$ |

|                 |            |            |           |         |
|-----------------|------------|------------|-----------|---------|
| TLH, cm         | 398.8±63.5 | 460.2±50.5 | 86.5±7.7  | <0.001* |
| Knee kinematics |            |            |           |         |
| F-E, °          | 57.9±5.7   | 58.1±5.1   | 90.9±6.4  | 0.919   |
| IR-ER, °        | 14.4±3.8   | 16.8±3.5   | 76.5±12.4 | 0.007*  |
| VR-VL, °        | 12.9±5.0   | 13.6±4.8   | 71.1±15.8 | 0.529   |
| A-P, mm         | 27.2±9.3   | 28.6±11.3  | 69.4±16.0 | 0.583   |
| P-D, mm         | 26.0±9.1   | 24.0±9.8   | 76.4±22.3 | 0.294   |
| M-L, mm         | 15.2±5.0   | 14.5±6.7   | 72.8±17.1 | 0.516   |

<sup>a</sup> Data are expressed as mean ± standard deviation; F-E: flexion-extension; IR-ER: internal-external rotation; VR-VL: varus-valgus; A-P: anterior-posterior translation; M-L: medial-lateral translation; P-D: proximal-distal translation; \*Statistically significant difference (P<0.05)

### Supplementary Table 3 Rates of criterion fulfillment

| Pass criteria                                                                 | Percentage of subjects passed criterion |
|-------------------------------------------------------------------------------|-----------------------------------------|
| LSI > 90 % peak torque quadriceps 60°/s                                       | 42.3%                                   |
| LSI > 90 % peak torque hamstrings 60°/s                                       | 38.5%                                   |
| LSI>90% SLH test                                                              | 30.8%                                   |
| LSI>90% TLH test                                                              | 38.5%                                   |
| Bilateral displacement difference of knee joint<3mm                           | 84.6%                                   |
| Differences of ROM in flexion-extension<10%                                   | 69.2%                                   |
| Differences of ROM in varus-valgus<10%                                        | 23.1%                                   |
| Differences of ROM in internal-external rotation<10%                          | 19.2%                                   |
| Differences of ROM in anterior-posterior translation<10%                      | 23.1%                                   |
| Differences of ROM in proximal-distal translation<10%                         | 30.8%                                   |
| Differences of ROM in medial-lateral translation<10%                          | 26.9%                                   |
| IKDC score within 15th percentile of normal age– and sex-specific group point | 53.8%                                   |
| ACL-RSI score>56                                                              | 30.8%                                   |

## Analysis for patients received hamstring tendon autograft

Significant differences between affected and contralateral limbs were observed in the quadriceps strength ( $P < 0.001$ ), hamstring strength ( $P = 0.003$ ), SH distance ( $P < 0.001$ ), and TH distance ( $P < 0.001$ ) at 9 months after ACLR. Affected limbs had smaller rotational angles than did contralateral limbs ( $P = 0.003$ ); no significant difference in other kinematic parameters was observed. The mean kinematics LSIs did not exceed 80%, except for that for the flexion angle ROM (Supplementary Table 5).

Four (14.81%) patients fulfilled the criteria of the test protocol. Ten patients fulfilled the quadriceps and 11 patients fulfilled the hamstring strength criteria, 9 patients fulfilled the SH criterion, 11 patients fulfilled the TH criterion, and 22 patients fulfilled the knee laxity criterion. Twenty, 6, 6 patients fulfilled the flexion-extension, varus-valgus, and internal-external rotation ROM criterion. Five, 8, and 7 patients, respectively, fulfilled the anterior-posterior, proximal-distal, medial-lateral translation ROM criterion. Fourteen patients fulfilled the IKDC scale score criterion and 10 patients fulfilled the ACL-RSI scale score criterion (Supplementary Table 6).

The trend of the results and conclusion are consistent with the overall group.

### Supplementary Table 4 Participant characteristics of patients received hamstring tendon autograft

|                             | Patients        |
|-----------------------------|-----------------|
| Sex: male/female, n         | 24/3            |
| Injured knee: left/right, n | 11/16           |
| Age, y                      | $27.7 \pm 6.0$  |
| Height, cm                  | $178.7 \pm 6.5$ |
| Weight, kg                  | $77.4 \pm 14.3$ |
| BMI, kg/m <sup>2</sup>      | $24.1 \pm 3.4$  |
| Time post-surgery, m        | $9.3 \pm 0.5$   |
| IKDC score                  | $81.6 \pm 11.1$ |
| ACL-RSI score               | $50.0 \pm 9.7$  |

BMI: body mass index; IKDC: International Knee Documentation Committee Subjective Knee Evaluation Form; ACL-RSI: Anterior Cruciate Ligament-Return to Sport After Injury Scale

### Supplementary Table 5 Functional and kinematics parameters <sup>a</sup>

|                          | Affected limb    | Contralateral limb | LSI             | P value     |
|--------------------------|------------------|--------------------|-----------------|-------------|
| Functional tests         |                  |                    |                 |             |
| Extensor strength, Nm/kg | $1.5 \pm 0.5$    | $1.9 \pm 0.6$      | $83.8 \pm 19.4$ | $< 0.001^*$ |
| Flexor strength, Nm/kg   | $0.9 \pm 0.3$    | $1.1 \pm 0.3$      | $86.2 \pm 25.2$ | $0.003^*$   |
| SLH, cm                  | $127.9 \pm 15.2$ | $145.5 \pm 13.3$   | $87.9 \pm 6.1$  | $< 0.001^*$ |

|                 |              |              |             |          |
|-----------------|--------------|--------------|-------------|----------|
| TLH, cm         | 402.2 ± 63.5 | 460.6 ± 50.5 | 87.1 ± 7.8  | < 0.001* |
| Laxity, mm      | 16.5 ± 3.0   | 15.8 ± 3.2   |             | 0.227    |
| Knee kinematics |              |              |             |          |
| F-E, °          | 57.4 ± 5.3   | 58.1 ± 4.9   | 91.8 ± 6.6  | 0.565    |
| IR-ER, °        | 14.3 ± 3.6   | 16.8 ± 3.5   | 77.2 ± 12.5 | 0.003*   |
| VR-VL, °        | 12.4 ± 4.6   | 13.8 ± 4.8   | 74.5 ± 16.3 | 0.145    |
| A-P, mm         | 25.4 ± 7.9   | 27.6 ± 11.3  | 68.9 ± 16.1 | 0.353    |
| P-D, mm         | 25.7 ± 9.7   | 24.6 ± 10.4  | 74.9 ± 23.2 | 0.585    |
| M-L, mm         | 14.8 ± 5.2   | 14.2 ± 6.8   | 72.3 ± 16.7 | 0.589    |

<sup>a</sup> Data are expressed as mean ± standard deviation; F-E: flexion-extension; IR-ER: internal-external rotation; VR-VL: varus-valgus; A-P: anterior-posterior translation; M-L: medial-lateral translation; P-D: proximal-distal translation; \*Statistically significant difference (P < 0.05)

**Supplementary Table 6 Rates of criterion fulfillment**

| Pass criteria                                                                 | Percentage of subjects passed criterion |
|-------------------------------------------------------------------------------|-----------------------------------------|
| LSI > 90 % peak torque quadriceps 60°/s                                       | 37.0%                                   |
| LSI > 90 % peak torque hamstrings 60°/s                                       | 40.7%                                   |
| LSI > 90% SLH test                                                            | 33.3%                                   |
| LSI > 90% TLH test                                                            | 40.7%                                   |
| Bilateral displacement difference of knee joint < 3mm                         | 81.5%                                   |
| Differences of ROM in flexion-extension < 10%                                 | 70.4%                                   |
| Differences of ROM in varus-valgus < 10%                                      | 22.2%                                   |
| Differences of ROM in internal-external rotation < 10%                        | 22.2%                                   |
| Differences of ROM in anterior-posterior translation < 10%                    | 18.5%                                   |
| Differences of ROM in proximal-distal translation < 10%                       | 29.6%                                   |
| Differences of ROM in medial-lateral translation < 10%                        | 29.6%                                   |
| IKDC score within 15th percentile of normal age– and sex-specific group point | 51.9%                                   |
| ACL-RSI score > 56                                                            | 37.0%                                   |
